1 **Inoculation with the mycorrhizal fungus *Rhizophagus irregularis* modulates**  
2 **the relationship between root growth and nutrient content in maize (*Zea mays***  
3 **ssp. *mays* L.)**

4 M. Rosario Ramírez-Flores<sup>1</sup>, Elohim Bello-Bello<sup>2</sup>, Rubén Rellán-Álvarez<sup>2,3</sup>, Ruairidh J. H.  
5 Sawers<sup>2,4\*</sup> and Víctor Olalde-Portugal<sup>1\*</sup>

6 <sup>1</sup>Departamento de Biotecnología y Bioquímica, Centro de Investigación y de Estudios  
7 Avanzados (CINVESTAV-IPN), Irapuato, C.P. 36821, Guanajuato, México.

8 <sup>2</sup>Laboratorio Nacional de Genómica para la Biodiversidad/Unidad de Genómica Avanzada,  
9 Centro de Investigación y de Estudios Avanzados, Instituto Politécnico Nacional (CINVESTAV-  
10 IPN), Irapuato, C.P. 36821, Guanajuato, México.

11 <sup>3</sup>Department of Molecular and Structural Biochemistry, North Carolina State University, NC,  
12 USA.

13 <sup>4</sup>Department of Plant Science, The Pennsylvania State University, State College, PA, USA.

14

15 \* Author for correspondence [rjs6686@psu.edu](mailto:rjs6686@psu.edu); [v\\_olalde@yahoo.com.mx](mailto:v_olalde@yahoo.com.mx)

16

17

18

19

20 **ABSTRACT**

21 Plant root systems play an essential role in nutrient and water acquisition. In resource-limited  
22 soils, modification of root system architecture is an important strategy to optimize plant  
23 performance. Most terrestrial plants also form symbiotic associations with arbuscular  
24 mycorrhizal fungi to maximize nutrient uptake. In addition to direct delivery of nutrients,  
25 arbuscular mycorrhizal fungi benefit the plant host by promoting root growth. Here, we aimed to  
26 quantify the impact of arbuscular mycorrhizal symbiosis on root growth and nutrient uptake in  
27 maize. Inoculated plants showed an increase in both biomass and the total content of twenty  
28 quantified elements. In addition, image analysis showed mycorrhizal plants to have denser, more  
29 branched root systems. For most of the quantified elements, the increase in content in  
30 mycorrhizal plants was proportional to root and overall plant growth. However, the increase in  
31 boron, calcium, magnesium, phosphorus, sulfur and strontium was greater than predicted by root  
32 system size alone, indicating fungal delivery to be supplementing root uptake.

33

34 **KEYWORDS:** mycorrhiza, root development, ionome, maize

## 35 INTRODUCTION

36 Plant productivity is typically limited by the availability of nutrients, in both natural and  
37 agricultural ecosystems. Under nutrient-poor conditions, plants have the capacity to modulate the  
38 architecture and functionality of their root system, potentially increasing nutrient uptake (Lynch,  
39 1995). Beyond a general reallocation of resources from leaf to root, there are nutrient-specific  
40 changes in the development of primary (PR) and lateral (LR) roots, building a root system  
41 architecture (RSA) that may better optimize resource acquisition (López-Bucio et al., 2003;  
42 Osmont et al., 2007; Gruber et al., 2013). Nutrients are heterogeneously distributed in the soil,  
43 and plants respond to local concentration, allocating greater root production to regions of higher  
44 availability (Campbell et al., 1991; Farley and Fitter, 1999; Grossman and Rice, 2012). In  
45 addition, nutrient distribution varies across soil horizons: poorly-mobile nutrients such as  
46 phosphorus (P), potassium (K), magnesium (Mg) or calcium (Ca) are typically enriched in  
47 topsoil, while more mobile nutrients, such as nitrogen (N), are typically more abundant deeper in  
48 the soil (Rubio et al., 2003; Ho et al., 2004; Lynch and Brown, 2008; Postma et al., 2014;  
49 Rangarajan et al., 2018). As a consequence, researchers have distinguished RSAs optimized for  
50 topsoil versus deeper foraging (Lynch, 2019).

51 Root development is regulated by the combined action of internal developmental  
52 pathways and external environmental stimuli (Malamy and Ryan, 2001), conditioning both  
53 plasticity and intra- and inter-specific variation. These pathways are based on the action of plant  
54 hormones, signal receptors, transcription factors and secondary messengers, including  $\text{Ca}^{2+}$ ,  
55 nitric oxide and reactive oxygen species (Fukaki and Tasaka, 2009; Garay-Arroyo et al., 2012;  
56 Jung and McCouch, 2013; Schlicht et al., 2013; Zhang et al., 2015; Shahzad and Amtmann,  
57 2017). Auxin works with cytokinin to regulate LR initiation (Aloni et al., 2006), and with

58 gibberellin to modulate cell proliferation and elongation (Fu and Harberd, 2003). Strigolactones  
59 impact LR formation and root hair development in a dose-dependent manner (Koltai, 2011), and,  
60 in maize, promote nodal root development (Guan et al., 2012). RSA is largely a product of the  
61 balance between root elongation and branching (Postma et al., 2014). Primary root growth will  
62 continue if the root meristem is active and populations of stem cells within the quiescent center  
63 are maintained. In *Arabidopsis*, the exhaustion of the primary root meristem under low P is  
64 considered the classic example of a plastic response to optimize topsoil foraging (Williamson et  
65 al., 2001; López-Bucio et al., 2002; Mora-Macías et al., 2017). Root branching, through the  
66 production of first- or higher- order LRs, is regulated at the level of the formation of LR  
67 primordia and their subsequent expansion. Low availability of N, P, sulfur (S) or zinc (Zn)  
68 promotes an increase in the density and/or length of LRs, although, as mentioned above, when  
69 the nutrient distribution is patchy, LRs may proliferate in regions of high local nutrient  
70 abundance (Zhang et al., 1999; Kutz et al., 2002; López-Bucio et al., 2002; Bouranis et al., 2008;  
71 Gruber et al., 2013). In cereal crops, the bulk of the adult root system is comprised of shoot-  
72 borne crown (CR) roots and associated LRs (Hochholdinger and Tuberosa, 2009). While greater  
73 branching will increase the surface area for nutrient uptake, it becomes inefficient if placement  
74 of roots in close proximity results in competition for the same nutrients, an effect that will be  
75 greater for more mobile nutrients (Postma et al., 2014).

76         Significant intra-specific variation has been observed in RSA and plasticity, and has been  
77 linked to superior agronomic performance in crops under specific edaphic conditions. In  
78 common bean, varieties producing shallow basal roots and a large number of adventitious roots  
79 explore the topsoil more efficiently, performing better in low P soils (Rubio et al., 2003; Lynch  
80 and Brown, 2008). In rice, the PHOSPHATE STARVATION TOLERANCE 1 (PSTO1) kinase,



81 identified from the traditional variety Kasalath, is associated with enhanced early root growth,  
82 and increases yield under low P conditions (Wissuwa et al., 2005; Gamuyao et al., 2012).

83         In addition to relying on their roots to acquire nutrients, most terrestrial plants also form  
84 mutualistic symbioses with arbuscular mycorrhizal (AM) fungi of the Phylum Glomeromycota  
85 (Parniske, 2008; Smith and Read, 2010). The association with AM fungi is one of the oldest  
86 plant symbioses, and AM symbioses were likely important during plant colonization of the land,  
87 performing essential functions before the evolution of the vascular root system (Schüßler et al.,  
88 2001). Establishment of AM symbiosis requires a complex interchange of signals between plant  
89 and fungus that results in the entry of the fungus into the root and the development of highly  
90 branched arbuscules within the root cortical cells, providing the primary site of nutrient exchange  
91 (Parniske, 2008). AM fungi are obligate symbionts, obtaining carbon from their plant host in  
92 return for providing nutrients and water that are acquired by an extensive network of root-  
93 external hyphae (Bago et al., 2003). The clearest benefit to the plant is enhanced P uptake (Chiu  
94 and Paszkowski, 2019), although AM fungi have been reported to promote uptake of other  
95 elements, including N, Fe, S and Zn (Liu et al., 2000; González-Guerrero et al., 2005;  
96 Govindarajulu et al., 2005; López-Pedrosa and González-Guerrero, 2006; Allen and Shachar-  
97 Hill, 2009). In practice, complex interactions between nutrients influence the outcome of the  
98 symbiosis with respect to any given element (Liu et al., 2000; Gerlach et al., 2015; Ramírez-  
99 Flores et al., 2017). Although AM symbioses are widespread in both natural ecosystems and  
100 cultivated fields, the plant host maintains a degree of control over establishment and the extent of  
101 colonization, rejecting the fungus under high nutrient conditions (Nouri et al., 2014).

102         AM fungi not only directly deliver nutrients, but also promote growth of the host plant  
103 roots, with secondary effects on nutrient uptake. General improvements in plant health under

104 AM symbiosis may be correlated with increased root system size (Berta et al., 1995; Tisserant et  
105 al., 1996; Gutjahr et al., 2009; Sawers et al., 2017). AM symbiosis is also associated with  
106 developmental changes, such as an increase in LR production and greater root branching (Berta  
107 et al., 1990; Paszkowski and Boller, 2002; Oláh et al., 2005; Gutjahr et al., 2009). The failure to  
108 form LR primordia in the maize *lateral rootless1 (lrt1)* mutant can be partially overcome by AM  
109 symbiosis, indicating an influence on plant developmental pathways (Hochholdinger and Feix,  
110 1998; Paszkowski and Boller, 2002). In *Medicago truncatula*, developing fungal spores are  
111 sufficient to trigger LR formation (Oláh et al., 2005; Gutjahr et al., 2009). In rice, AM fungi can  
112 induce LR formation in *pollux*, *ccamk* and *cyclops* mutants, even though symbiosis is not  
113 established, confirming that RSA modification need not be dependent on enhanced host plant  
114 nutrition (Gutjahr et al., 2009).

115         The impact of AM symbiosis on nutrient uptake can be quantified by comparing the  
116 concentration or content of a given element in the aerial portion of mycorrhizal (M) and non-  
117 colonized (NC) plants (Gerlach et al., 2015; Ramírez-Flores et al., 2017). Such a comparison,  
118 however, does not distinguish direct hyphal nutrient delivery from the secondary consequences  
119 of fungus-induced modification of root architecture or the effects of greater root growth resulting  
120 from a general increase in plant vigor. In the case of P, elegant labelling experiments and  
121 extensive functional studies have clearly demonstrated the direct role of root-external hyphae in  
122 nutrient delivery (Pearson and Jakobsen, 1993; Smith et al., 2003; Chiu and Paszkowski, 2019).  
123 The picture, however, remains less clear with respect to other mineral nutrients.

124         In this study, we characterized RSA and leaf ionome in young maize plants, grown with  
125 or without inoculation with AM fungi. For each nutrient, we asked whether any increase in  
126 uptake was explainable by changes in the root system alone, or whether there was evidence of

127 additional hyphal foraging. For an increase resulting from greater root growth, we expected the  
128 relationship between root surface area and uptake to be maintained, albeit that mycorrhizal plants  
129 themselves were larger. If, however, there was a significant effect of hyphal foraging, we  
130 predicted an increase in uptake per unit surface area of root.

131

## 132 **MATERIALS AND METHODS**

133

### 134 *Plant material and growth conditions*

135 Two maize inbred lines (*Zea mays* ssp. *mays* var. B73 and W22) were grown with (M) or  
136 without (NC) inoculation with fungus, in PVC tubes (1 m in height, 15 cm in diameter). A total  
137 of 64 plants (2 genotypes x 2 treatments x 16 replicates) were planted in complete blocks across  
138 four planting dates. Each planting consisted of 16 plants (2 genotypes x 2 treatments x 4  
139 replicates), with a one week interval between planting dates. B73 seed was produced in the  
140 winter of 2015 in Valle de Banderas, Nayarit, México. W22 seed was produced in the summer of  
141 2013 in Aurora, New York, USA. Each tube was filled with 17 L of a sterilized substrate mix  
142 consisting of sand:perlite:silt (4.5:1.5:1, v/v). The substrate Olsen P concentration was 4.8 ppm.  
143 For M plants, we inoculated each tube with ~700 *Rhizophagus irregularis* spores collected from  
144 a commercial liquid inoculant (AGTIV®) and delivered to the middle of the tube at 15 cm depth  
145 before planting. The experiment was conducted under greenhouse conditions, at an average  
146 temperature of 24 °C and humidity of 48%. Maize seeds were surface sterilized with 1% sodium  
147 hypochloride solution for 10 min and rinsed five times with sterile distilled water. Seeds were  
148 then placed in 30 ml of sterile distilled water and shaken for 48 hours before planting. From 5  
149 days after emergence (DAE), plants were watered every other day with 200mL of  $\frac{1}{3}$  Hoagland

150 solution, modified to a final P concentration of 25  $\mu$ M (Hoagland and Broyer, 1936). Plants were  
151 harvested at 56 DAE.

152

### 153 *Evaluation of plant growth*

154 Leaf length and width were measured manually, and leaf area estimated as 0.75 x length x width  
155 (Mollier and Pellerin, 1999). Shoot and root fresh weights were measured after cutting the aerial  
156 part and washing the root. Dry weight was determined by oven drying tissue at 70° for 48 hrs.  
157 Root volume was measured by submergence in a test tube and recording of the volume of water  
158 displaced.

159

### 160 *Estimation of fungal colonization in seedling roots*

161 Lateral root segments were collected at random from the upper 15 cm of the root system, placed  
162 in 10% KOH solution, autoclaved for 10 min, and stained with 0.05% trypan blue in  
163 acetoglycerol. The percentage of root length colonized was quantified in 15 root pieces per plant  
164 using a modified grid-line intersect method (McGonigle et al., 1990).

165

### 166 *Characterization of root system architecture by image analysis*

167 The cleaned root system was placed in a water-filled tub and photographed using a digital Nikon  
168 camera D3500. Raw images were individually processed using Adobe® Photoshop® CC (Version  
169 14.0) to remove background and increase contrast. Processed images were scaled and analyzed  
170 using GiA Roots software (Galkovskyi et al. 2012). After scale calibration, the images were  
171 segmented using the adaptive thresholding method and basic parameter settings were manually  
172 optimized. Finally, all binary images were analyzed to quantify the root system traits. Stacked

173 (overlay) root system images were generated using the stacks tool in ImageJ/Fiji (version 2.0.0).

174 Root traits are described in Supplementary Table S1.

175

#### 176 *Analysis of the leaf ionome*

177 The third youngest leaf (variously, leaf 5 or 6 for different individuals) was collected for ionic  
178 analysis using inductively coupled plasma mass spectrometry (ICP-MS) as described previously  
179 ( Ziegler et al. 2013, Ramírez-Flores et al., 2017). Briefly, weighed tissue samples were digested  
180 in 2.5 ml of concentrated nitric acid (AR Select Grade, VWR) with an added internal standard  
181 (20 p.p.b. In, BDH Aristar Plus). The concentration of the elements B, Na, Mg, Al, P, S, K, Ca,  
182 Mn, Fe, Co, Ni, Cu, Zn, As, Se, Rb, Sr, Mo and Cd was measured using an Elan 6000 DRC-e  
183 mass spectrometer (Perkin-Elmer SCIEX) connected to a PFA microflow nebulizer (Elemental  
184 Scientific) and Apex HF desolvator (Elemental Scientific). A control solution was run every 10th  
185 sample to correct for machine drift both during a single run and between runs. Given that  
186 samples were digested in concentrated nitric acid prior to analysis and run in a 70% N  
187 atmosphere, it was not possible to accurately estimate N concentration.

188

#### 189 *Statistical analyses and data visualization*

190 All statistical analyses were performed in R (R Core Team, 2019). From the initial planting, a  
191 small number of plants did not germinate. In addition, we removed clear outliers (assessed by  
192 visual inspection of plant growth and health) and any plants assigned to the non-inoculated group  
193 that showed evidence of root-internal hyphal structures. The final dataset consisted of 53  
194 individuals (Table S2). Leaf surface area estimates were square root transformed for analysis. A  
195 linear fixed-effect model was applied on a trait-by-trait basis to control for differences between

196 the four planting dates. Principal component (PC) analysis was performed on Gia Roots traits  
197 along with root fresh (RFW) and dry weight (RDW), using R/ade4::dudi.pca (Dray and Dufour,  
198 2007) with centered and scaled values. Linear Discriminant (LD) analysis on PC scores was  
199 performed with R/MASS::lda (Venables and Ripley, 2002). Ionomic analysis generated element  
200 concentration data; in addition, total element content was estimated as the product of  
201 concentration and shoot dry weight (SDW).

202 Data were analyzed using R/stats::lm to fit inoculation status and genotype in a complete  
203 model. After adjustment for multiple testing (R/stats::p.adjust; method = "BH"), no significant (p  
204 < 0.05) interaction between inoculation x genotype was detected for any trait, and we present  
205 here the additive model for simplicity. We also performed a one-way ANOVA with a single  
206 four-level treatment factor (B73.NC, B73.M, W22.NC and W22.M) that was used to assign  
207 means groups with R/agricolae::HSD.test (de Mendiburu, 2019) for presentation in Fig. S1. Box  
208 plots were generated with base R using default settings. Root images were pre-processed using  
209 [imagemagick \(www.imagemagick.org\)](http://www.imagemagick.org), converting them to png format, setting the background  
210 to transparent and reducing the alpha level. Images were imported into R using R/png and plotted  
211 onto the PCA/LD space using the rasterImage function. Pearson's correlation coefficients were  
212 calculated using R/Hmisc::rcorr (Harrell, 2019) and visualized using R/gplots::heatmap.2  
213 (Warnes et al., 2019). The impact of root system size and inoculation on element content, was  
214 assessed using the model  $Content = NSA + Inoculation$ , evaluating the *Inoculation* term using  
215 sequential (Type I) sum-of-squares (implemented by default in R). For comparison, partial (Type  
216 III) sum-of-squares were calculated using R/car::Anova (Fox & Weisberg, 2011), setting the  
217 "contrasts" option to c("contr.sum", "contr.poly").

218

## 219 RESULTS

### 220 Growth of maize seedlings increased when inoculated with *Rhizophagus irregularis*

221 To evaluate the relationship between root system architecture (RSA) and nutrient acquisition in  
222 mycorrhiza plants, we grew the two maize inbred lines B73 and W22 under low phosphorus (P)  
223 conditions, with (M) or without (NC) inoculation with the AM fungus *Rhizophagus irregularis*  
224 (Fig. 1A). These two widely used inbred lines were selected to provide a reference for future  
225 work, and to allow greater generalization than would be possible based on a single genotype.  
226 B73 is the reference for the most complete maize genome assembly. W22 is the background for  
227 the primary publicly available maize reverse genetics collections. Inoculation with AM fungus  
228 significantly enhanced plant growth in both genotypes (Fig. 1B, S1, S2. Table 1). Fungal  
229 inoculation and plant genotype were both significant ( $p < 0.001$ ) predictors of plant biomass but  
230 there was no evidence of an interaction between the two (Fig. S2, Table 1; S2). By harvest (55  
231 DAE), the marginal effect of inoculation on shoot dry weight (SDW) was an increase of 142%  
232 (Table 1). In both M and NC treatments, B73 tended to be smaller than W22, the range of SDW  
233 overlapping between B73 M and W22 NC treatments (Fig. 1, S1, S2). The inclusion of plants  
234 similar in size, yet differing in inoculation status, was important for our subsequent interpretation  
235 of element content.

236 To quantify mycorrhizal colonization, the percentage of root length containing different  
237 fungal structures was estimated by microscopic inspection. NC plants were confirmed to be free  
238 from colonization (fungal structures were observed in three plants in the NC group; these  
239 individuals were not included in the analysis), while inoculated plants showed fungal structures  
240 typical of the symbiosis (hyphae, arbuscules and vesicles). M plants were well colonized (Fig.

241 1C-E), and there was no difference in colonization rate between the two plant genotypes (Fig S1.  
242 Table S2).

243

#### 244 **The root system was modified by inoculation with *Rhizophagus irregularis***

245 Root fresh and dry weight (RFW and RDW) and root volume (RV) increased significantly in  
246 inoculated plants (Fig. 2A. Table 1). To characterize RSA, we photographed the plants and  
247 analyzed the images with GiA Roots (General Image Analysis of Roots; Galkovskyi et al.,  
248 2012). Ten GiA Roots traits showed a significant response to inoculation (Table 1. Fig. S1). In a  
249 principal component (PC) analysis using all 19 GiA Roots traits, the first four PCs explained  
250 90% of the total variance (Fig. 2B; 2C). PC1 (explaining 59% of the total variance) was  
251 dominated by variables associated with overall root system and plant size (Fig. 2; 4A). PC2  
252 (explaining 12% of the total variance) was associated with overall root system shape and aspect  
253 ratio (Fig. 2; 4A). PC3 (7%) and PC4 (7%) captured aspects of root branching and root system  
254 solidity (Fig. 3; 4A). NC and M plants were well differentiated by PC1 and, to a lesser extent, by  
255 PC3, indicating a shift towards larger, more branched/solid root systems in M plants. GiA Roots  
256 evaluated solidity as the total network area divided by the network convex area. Although,  
257 greater solidity was clear in M W22, the root system in the smallest B73 NC plants was also  
258 considered relatively solid because the convex area itself was so low. We performed a linear  
259 discriminant (LD) analysis using the root PC values, reinforcing the separation of M and NC  
260 plants by size and solidity of the root system and better distinguishing the W22 M and B73 NC  
261 treatments (Fig. 3).

262

#### 263 **Nutrient content was correlated with root system size and mycorrhizal colonization**



264 AM fungi can increase plant nutrient uptake by delivery of nutrients via the hyphal network and  
265 as a secondary consequence of promoting root growth. To better understand the relative  
266 importance of these two factors, we considered the relationship between root system size and  
267 mineral nutrient content. We determined the concentration of 20 different elements, including P,  
268 in leaf tissue using inductively coupled plasma mass spectrometry (ICP-MS). Although leaf  
269 element concentration provides an endpoint readout of various aspects of plant nutrient relations  
270 (Salt et al., 2008), it was used here as a proxy for nutrient uptake. We estimated nutrient content  
271 as the product of leaf concentration and total shoot dry weight and investigated the relationship  
272 with the GiaRoots trait NSA (Network Surface Area), used as our measure of root system size.  
273 As expected, an increase in NSA (associated with larger plants) was correlated with greater  
274 nutrient content (Fig. 4B). Of greater interest, however, was the degree to which this relationship  
275 was modified by AM colonization; *i.e.* for any given nutrient, was NSA sufficient to explain  
276 element content in M plants? We ran a linear model using NSA and inoculation status as  
277 predictors, assessing inoculation based on sequential (Type I) sum-of-squares, evaluating any  
278 fungal effect beyond that explained by NSA alone (Fig. 5). A significant positive effect of  
279 inoculation was associated with boron (B), Ca, Mg, P, S and strontium (Sr), indicating a unit of  
280 root surface area to be associated with a greater leaf content of these elements in inoculated  
281 plants.

282

## 283 **DISCUSSION**

284 Inoculation with *Rhizophagus irregularis* resulted in increased growth of maize grown under low  
285 P availability. In comparison with a previous small pot evaluation (Sawers et al., 2017), plants  
286 were larger, and the proportional increase in M plants was greater, presumably reflecting less

287 growth inhibition in the larger tubes that we used here. A difference in leaf surface area was  
288 observed by day 40 - 45 after emergence, broadly consistent with the timing reported in rice for  
289 the first observation of arbuscules and the accumulation of transcripts encoding mycorrhiza-  
290 associated P transporters (Gutjahr et al., 2008). AM colonization was correlated not only with an  
291 increase in root system size, but also in the degree of branching and solidity of the root system  
292 (as captured by the GiA Roots traits MaxNR, MNR, NS). Inoculation with AM fungi has  
293 previously been shown to promote root growth and branching in diverse plant hosts (Berta et al.,  
294 1990; Paszkowski and Boller, 2002; Oláh et al., 2005; Gutjahr et al., 2009).

295         Increased growth was accompanied by greater concentration of Ca, Mn, P and Sr in the  
296 leaves of M plants. The leaf concentration of K and Se was reduced in M plants, but for all  
297 elements, taking biomass into account, total content increased. The content of B, Ca, Mg, P, S  
298 and Sr following inoculation exceeded expectation based on root surface area alone. We interpret  
299 this to reflect the impact of hyphal foraging, although we do not discount additional  
300 contributions of enhanced root function (*e.g.* greater density or length of root hairs; stimulation  
301 of the plant uptake pathways, production of exudates by plant or fungus) or changes in nutrient  
302 partitioning. For other elements, the content in M plants could be explained by the larger root  
303 system alone, although there is the possibility of a “hidden” mycorrhizal contribution (*i.e.* fungal  
304 nutrient delivery balanced by an equivalent reduction in direct root uptake. Smith et al., 2003).

305         The growth increase in inoculated plants was likely driven by increased P uptake, given  
306 that the experiment was conducted under low P availability. The route of P from soil to fungus,  
307 and subsequent delivery to the plant host is well characterized (Chiu and Paszkowski, 2019). We  
308 saw clear evidence that a unit of mycorrhizal root translates to a greater quantity of P obtained  
309 than an equivalent unit of non-colonized root, as would be anticipated as a consequence of

310 hyphal foraging (Fig. 5). In comparison to P, the impact of AM colonization on the uptake of  
311 Ca, Mg and S (the other macronutrients for which our observations were consistent with hyphal  
312 foraging) is less well characterized (Gerlach et al., 2015; Ramírez-Flores et al., 2017). In the case  
313 of S, it has been shown that AM fungi have the capacity to transfer S from soil to their plant  
314 hosts (Gray and Gerdemann, 1973; Allen and Shachar-Hill, 2009), and that accumulation of  
315 plant sulphate transporter transcripts increases in colonized roots (Casieri et al., 2012;  
316 Giovannetti et al., 2014). Furthermore, the promoter of the *Lotus japonicus* sulphate transporter  
317 gene *LjSULTRI;2* is active in arbusculated cells (Giovannetti et al., 2014), suggesting a function  
318 in uptake from the peri-arbuscular space analogous to that of the PT4 high-affinity P transporter.  
319 With regard to Mg, transcripts encoding Mg transporters are known to accumulate to higher  
320 levels in wheat following mycorrhizal inoculation (Li et al., 2018). In common with P, the  
321 elements S, Ca and Mg are often poorly available due to low-mobility and formation of  
322 conjugates with other soil compounds (Kelly and Barber, 1991; Scherer, 2001; Lynch, 2019). As  
323 such, hyphal foraging and delivery of these nutrients by mycorrhizal fungi would be predicted to  
324 be of potential benefit to plants under field conditions. In the future, it will be informative to  
325 combine evaluation of RSA in the field with assessment of AM fungal communities and  
326 quantification of elements in reproductive stage plants and grain.

327

## 328 LITERATURE CITED

329 **Allen JW, Shachar-Hill Y** (2009) Sulfur transfer through an arbuscular mycorrhiza. *Plant*  
330 *Physiol* **149**: 549–560

331 **Aloni R, Aloni E, Langhans M, Ullrich CI** (2006) Role of cytokinin and auxin in shaping root  
332 architecture: regulating vascular differentiation, lateral root initiation, root apical dominance  
333 and root gravitropism. *Ann Bot* **97**: 883–893

334 **Bago B, Pfeffer PE, Abubaker J, Jun J, Allen JW, Brouillette J, Douds DD, Lammers PJ,**  
335 **Shachar-Hill Y** (2003) Carbon export from arbuscular mycorrhizal roots involves the

- 336 translocation of carbohydrate as well as lipid. *Plant Physiol* **131**: 1496–1507
- 337 **Berta G, Fusconi A, Trotta A, Scannerini S** (1990) Morphogenetic modifications induced by  
338 the mycorrhizal fungus *Glomus* strain E3 in the root system of *Allium porrum* L. *New*  
339 *Phytologist* **114**: 207–215
- 340 **Berta G, Trotta A, Fusconi A, Hooker JE, Munro M, Atkinson D, Giovannetti M, Morini S,**  
341 **Fortuna P, Tisserant B, Gianinazzi-Pearson V, Gianinazzi S** (1995) Arbuscular  
342 mycorrhizal induced changes to plant growth and root system morphology in *Prunus*  
343 *cerasifera*. *Tree Physiol* **15**: 281–293
- 344 **Bouranis DL, Buchner P, Chorianopoulou SN, Hopkins L, Protonotarios VE, Siyiannis VF,**  
345 **Hawkesford MJ** (2008) Responses to sulfur limitation in Maize. In NA Khan, S Singh, S  
346 Umar, eds, *Sulfur assimilation and abiotic stress in plants*. Springer Berlin Heidelberg,  
347 Berlin, Heidelberg, pp 1–19
- 348 **Campbell BD, Grime JP, Mackey JML** (1991) A trade-off between scale and precision in  
349 resource foraging. *Oecologia* **87**: 532–538
- 350 **Casieri L, Gallardo K, Wipf D** (2012) Transcriptional response of *Medicago truncatula*  
351 sulphate transporters to arbuscular mycorrhizal symbiosis with and without sulphur stress.  
352 *Planta* **235**: 1431–1447
- 353 **Chiu CH, Paszkowski U** (2019) Mechanisms and impact of symbiotic phosphate acquisition.  
354 *Cold Spring Harb Perspect Biol*. doi: 10.1101/cshperspect.a034603
- 355 **Farley RA, Fitter AH** (1999) The responses of seven co-occurring woodland herbaceous  
356 perennials to localized nutrient-rich patches. *J Ecol* **87**: 849–859
- 357 **Fox J & Weisberg S** (2011). An {R} companion to applied regression Second Edition.  
358 Thousand Oaks CA  
359
- 360 **Fukaki H, Tasaka M** (2009) Hormone interactions during lateral root formation. *Plant Mol Biol*  
361 **69**: 437–449
- 362 **Galkovskyi T, Mileyko Y, Bucksch A, Moore B, Symonova O, Price CA, Topp CN, Iyer-**  
363 **Pascuzzi AS, Zurek PR, Fang, Harer J, Benfey PN, Weitz JS** (2012) GiA Roots:  
364 software for the high throughput analysis of plant root system architecture. *BMC Plant Biol*  
365 **12**: 116
- 366 **Gamuyao R, Chin JH, Pariasca-Tanaka J, Pesaresi P, Catausan S, Dalid C, QLAmet-**  
367 **Loedin I, Tecson-Mendoza EM, Wissuwa M, Heuer S** (2012) The protein kinase Pst11  
368 from traditional rice confers tolerance of phosphorus deficiency. *Nature* **488**: 535–539
- 369 **Garay-Arroyo A, De La Paz Sánchez M, García-Ponce B, Azpeitia E, Alvarez-Buylla ER**  
370 (2012) Hormone symphony during root growth and development. *Dev Dyn* **241**: 1867–1885
- 371 **Gerlach N, Schmitz J, Polatajko A, Schlüter U, Fahnenstich H, Witt S, Fernie AR, Uroic K,**

- 372 **Scholz U, Sonnewald U, Bucher M** (2015) An integrated functional approach to dissect  
373 systemic responses in maize to arbuscular mycorrhizal symbiosis. *Plant, Cell &*  
374 *Environment* **38**: 1591–1612
- 375 **Giovannetti M, Tolosano M, Volpe V, Kopriva S, Bonfante P** (2014) Identification and  
376 functional characterization of a sulfate transporter induced by both sulfur starvation and  
377 mycorrhiza formation in *Lotus japonicus*. *New Phytol* **204**: 609–619
- 378 **González-Guerrero M, Azcón-Aguilar C, Mooney M, Valderas A, MacDiarmid CW, Eide**  
379 **DJ, Ferrol N** (2005) Characterization of a *Glomus intraradices* gene encoding a putative  
380 Zn transporter of the cation diffusion facilitator family. *Fungal Genet Biol* **42**: 130–140
- 381 **Govindarajulu M, Pfeffer PE, Jin H, Abubaker J, Douds DD, Allen JW, Bücking H,**  
382 **Lammers PJ, Shachar-Hill Y** (2005) Nitrogen transfer in the arbuscular mycorrhizal  
383 symbiosis. *Nature* **435**: 819–823
- 384 **Gray LE, Gerdemann JW** (1973) Uptake of sulphur-35 by vesicular-arbuscular mycorrhizae.  
385 *Plant and Soil* **39**: 687–689
- 386 **Grossman JD, Rice KJ** (2012) Evolution of root plasticity responses to variation in soil nutrient  
387 distribution and concentration. *Evol Appl* **5**: 850–857
- 388 **Gruber BD, Giehl RFH, Friedel S, von Wirén N** (2013) Plasticity of the *Arabidopsis* root  
389 system under nutrient deficiencies. *Plant Physiol* **163**: 161–179
- 390 **Guan JC, Koch KE, Suzuki M, Wu S, Latshaw S, Petruff T, Goulet C, Klee HJ, McCarty**  
391 **DR** (2012) Diverse roles of strigolactone signaling in maize architecture and the uncoupling  
392 of a branching-specific subnetwork. *Plant Physiol* **160**: 1303–1317
- 393 **Gutjahr C, Banba M, Croset V, An K, Miyao A, An G, Hirochika H, Imaizumi-Anraku H,**  
394 **Paszkowski U** (2008) Arbuscular mycorrhiza-specific signaling in rice transcends the  
395 common symbiosis signaling pathway. *Plant Cell* **20**: 2989–3005
- 396 **Gutjahr C, Casieri L, Paszkowski U** (2009) *Glomus intraradices* induces changes in root  
397 system architecture of rice independently of common symbiosis signaling. *New Phytol* **182**:  
398 829–837
- 399 **Harrell Jr F** with contributions from Charles Dupont and many others (2019). Hmisc: Harrell  
400 Miscellaneous. R package version 4.2-0.  
401
- 402 **Hoagland DR, Broyer TC** (1936) General nature of the process of salt accumulation by roots  
403 with description of experimental methods. *Plant Physiol* **11**: 471–507
- 404 **Hochholdinger F, Feix G** (1998) Early post-embryonic root formation is specifically affected in  
405 the maize mutant *lrt1*. *Plant J* **16**: 247–255
- 406 **Hochholdinger F, Tuberosa R** (2009) Genetic and genomic dissection of maize root  
407 development and architecture. *Curr Opin Plant Biol* **12**: 172–177

- 408 **Ho MD, McCannon BC, Lynch JP** (2004) Optimization modeling of plant root architecture for  
409 water and phosphorus acquisition. *J Theor Biol* **226**: 331–340
- 410 **Jung JKH, McCouch S** (2013) Getting to the roots of it: Genetic and hormonal control of root  
411 architecture. *Front Plant Sci* **4**: 186
- 412 **Kelly JM, Barber SA** (1991) Magnesium uptake kinetics in loblolly pine seedlings. *Plant and*  
413 *Soil* **134**: 227–232
- 414 **Koltai H** (2011) Strigolactones are regulators of root development. *New Phytol* **190**: 545–549
- 415 **Kutz A, Muller A, Hennig P, Kaiser WM, Piotrowski M, Weiler EW** (2002) A role for  
416 *nitrilase 3* in the regulation of root morphology in sulphur-starving *Arabidopsis thaliana*.  
417 *Plant J* **30**: 95–106
- 418 **Li M, Wang R, Tian H, Gao Y** (2018) Transcriptome responses in wheat roots to colonization  
419 by the arbuscular mycorrhizal fungus *Rhizophagus irregularis*. *Mycorrhiza* **28**: 747–759
- 420 **Liu A, Hamel C, Hamilton RI, Ma BL, Smith DL** (2000) Acquisition of Cu, Zn, Mn and Fe by  
421 mycorrhizal maize (*Zea mays* L.) grown in soil at different P and micronutrient levels.  
422 *Mycorrhiza* **9**: 331–336
- 423 **López-Bucio J, Cruz-Ramírez A, Herrera-Estrella L** (2003) The role of nutrient availability  
424 in regulating root architecture. *Current Opinion in Plant Biology* **6**: 280–287
- 425 **López-Bucio J, Hernández-Abreu E, Sánchez-Calderón L, Nieto-Jacobo MF, Simpson J,**  
426 **Herrera-Estrella L** (2002) Phosphate availability alters architecture and causes changes in  
427 hormone sensitivity in the *Arabidopsis* root system. *Plant Physiol* **129**: 244–256
- 428 **López-Pedrosa A, González-Guerrero M** (2006) *GintAMT1* encodes a functional high-affinity  
429 ammonium transporter that is expressed in the extraradical mycelium of *Glomus*  
430 *intraradices*. *Fungal Genet. Biol.*
- 431 **Lynch JP** (1995) Root architecture and plant productivity. *Plant Physiol* **109**: 7–13
- 432 **Lynch JP** (2019) Root phenotypes for improved nutrient capture: an underexploited opportunity  
433 for global agriculture. *New Phytol.* doi: 10.1111/nph.15738
- 434 **Lynch JP, Brown KM** (2008) Root strategies for phosphorus acquisition. *Plant Ecophysiology*  
435 83–116
- 436 **Malamy JE, Ryan KS** (2001) Environmental regulation of lateral root initiation in *Arabidopsis*.  
437 *Plant Physiol* **127**: 899–909
- 438 **de Mendiburu F** (2019). agricolae: Statistical procedures for agricultural research. R package  
439 version 1.3-0.  
440
- 441 **McGonigle TP, Miller MH, Evans DG, Fairchild GL, Swan JA** (1990) A new method which



- 442 gives an objective measure of colonization of roots by vesicular-arbuscular mycorrhizal  
443 fungi. *New Phytol* **115**: 495–501
- 444 **Mollier A, Pellerin S** (1999) Maize root system growth and development as influenced by  
445 phosphorus deficiency. *J Exp Bot* **50**: 487–497
- 446 **Mora-Macías J, Ojeda-Rivera JO, Gutiérrez-Alanís D, Yong-Villalobos L, Oropeza-Aburto**  
447 **A, Raya-González J, Jiménez-Domínguez G, Chávez-Calvillo G, Rellán-Álvarez R,**  
448 **Herrera-Estrella L** (2017) Malate-dependent Fe accumulation is a critical checkpoint in  
449 the root developmental response to low phosphate. *Proc Natl Acad Sci U S A* **114**: E3563–  
450 E3572
- 451 **Nouri E, Breuillin-Sessoms F, Feller U, Reinhardt D** (2014) Phosphorus and nitrogen regulate  
452 arbuscular mycorrhizal symbiosis in *Petunia hybrida*. *PLoS One* **9**: e90841
- 453 **Oláh B, Brière C, Bécard G, Dénarié J, Gough C** (2005) Nod factors and a diffusible factor  
454 from arbuscular mycorrhizal fungi stimulate lateral root formation in *Medicago truncatula*  
455 via the DMI1/DMI2 signalling pathway. *Plant J* **44**: 195–207
- 456 **Osmont KS, Sibout R, Hardtke CS** (2007) Hidden branches: developments in root system  
457 architecture. *Annu Rev Plant Biol* **58**: 93–113
- 458 **Parniske M** (2008) Arbuscular mycorrhiza: the mother of plant root endosymbioses. *Nat Rev*  
459 *Microbiol* **6**: 763–775
- 460 **Paszkowski U, Boller T** (2002) The growth defect of *lrt1*, a maize mutant lacking lateral roots,  
461 can be complemented by symbiotic fungi or high phosphate nutrition. *Planta* **214**: 584–590
- 462 **Pearson JN, Jakobsen I** (1993) Symbiotic exchange of carbon and phosphorus between  
463 cucumber and three arbuscular mycorrhizal fungi. *New Phytologist* **124**: 481–488
- 464 **Postma JA, Dathe A, Lynch JP** (2014) The optimal lateral root branching density for maize  
465 depends on nitrogen and phosphorus availability. *Plant Physiol* **166**: 590–602
- 466 **Ramírez-Flores MR, Rellán-Álvarez R, Wozniak B, Gebreselassie M-N, Jakobsen I,**  
467 **Olalde-Portugal V, Baxter I, Paszkowski U, Sawers RJH** (2017) Co-ordinated changes  
468 in the accumulation of metal ions in maize (*Zea mays* ssp. *mays* L.) in response to  
469 inoculation with the arbuscular mycorrhizal fungus *Funneliformis mosseae*. *Plant Cell*  
470 *Physiol* **58**: 1689–1699
- 471 **Rangarajan H, Postma JA, Lynch JP** (2018) Co-optimization of axial root phenotypes for  
472 nitrogen and phosphorus acquisition in common bean. *Ann Bot* **122**: 485–499
- 473 **Rubio G, Liao H, Yan X, Lynch JP** (2003) Topsoil foraging and its role in plant  
474 competitiveness for phosphorus in common bean. *Crop Science* **43**: 598
- 475 **Salt DE, Baxter I, Lahner B** (2008) Ionomics and the study of the plant ionome. *Annu Rev*  
476 *Plant Biol* **59**: 709–733

- 477 **Sawers RJH, Svane SF, Quan C, Grönlund M, Wozniak B, Gebreselassie M-N, González-**  
478 **Muñoz E, Chávez Montes RA, Baxter I, Goudet J, Jakobsen I, Paszkowski U (2017)**  
479 **Phosphorus acquisition efficiency in arbuscular mycorrhizal maize is correlated with the**  
480 **abundance of root-external hyphae and the accumulation of transcripts encoding PHT1**  
481 **phosphate transporters. *New Phytol* **214**: 632–643**
- 482 **Scherer HW (2001) Sulphur in crop production. *European Journal of Agronomy* **14**: 81–111**
- 483 **Schlicht M, Ludwig-Müller J, Burbach C, Volkmann D, Baluska F (2013) Indole-3-butyric**  
484 **acid induces lateral root formation via peroxisome-derived indole-3-acetic acid and nitric**  
485 **oxide. *New Phytol* **200**: 473–482**
- 486 **Schüßler A, Schwarzott D, Walker C (2001) A new fungal phylum, the *Glomeromycota*:**  
487 **phylogeny and evolution. *Mycol Res* **105**: 1413–1421**
- 488 **Shahzad Z, Amtmann A (2017) Food for thought: how nutrients regulate root system**  
489 **architecture. *Curr Opin Plant Biol* **39**: 80–87**
- 490 **Smith SE, Read DJ (2010) Mycorrhizal Symbiosis. Academic Press**
- 491 **Smith SE, Smith FA, Jakobsen I (2003) Mycorrhizal fungi can dominate phosphate supply to**  
492 **plants irrespective of growth responses. *Plant Physiol* **133**: 16–20**
- 493 **Tisserant B, Gianinazzi S, Gianinazzi-Pearson V (1996) Relationships between lateral root**  
494 **order, arbuscular mycorrhiza development, and the physiological state of the symbiotic**  
495 **fungus in *Platanus acerifolia*. *Canadian Journal of Botany* **74**: 1947–1955**
- 496 **Venables, WN & Ripley, BD (2002) Modern Applied Statistics with S. Fourth Edition.**  
497 **Springer, New York**
- 498
- 499 **Warnes GR, Bolker B, Bonebakker L, Gentleman R, Huber W, Liaw A, Lumley T,**  
500 **Maechler M, Magnusson A, Moeller S, Schwartz M, Venables W (2019). gplots:**  
501 **Various R programming tools for plotting data. R package version 3.0.1.1.**  
502
- 503 **Williamson LC, Ribrioux SP, Fitter AH, Leyser HM (2001) Phosphate availability regulates**  
504 **root system architecture in *Arabidopsis*. *Plant Physiol* **126**: 875–882**
- 505 **Wissuwa M, Gatlula K, Ismail A (2005) Candidate gene characterization at the *Pup1* locus: a**  
506 **major QTL increasing tolerance of phosphorus deficiency.**
- 507 **Zhang H, Jennings A, Barlow PW, Forde BG (1999) Dual pathways for regulation of root**  
508 **branching by nitrate. *Proc Natl Acad Sci U S A* **96**: 6529–6534**
- 509 **Zhang Y, von Behrens I, Zimmermann R, Ludwig Y, Hey S, Hochholdinger F (2015)**  
510 ***LATERAL ROOT PRIMORDIA 1* of maize acts as a transcriptional activator in auxin**  
511 **signalling downstream of the *Aux/IAA* gene *rootless* with undetectable meristem 1. *J Exp***  
512 **Bot** **66**: 3855–3863



513 **Ziegler G, Terauchi A, Becker A, Armstrong P, Hudson K, Baxter I (2013) Ionomic**  
514 **screening of field-grown soybean identifies mutants with altered seed elemental**  
515 **composition. *The Plant Genome* 6: 0**

516

517

518

519

520 **Table 1. Traits responsive to inoculation with *Rhizophagus irregularis***

| Trait <sup>1</sup> | Description <sup>2</sup>            | NC    |       | M     |       | MR <sup>3</sup> (%) |
|--------------------|-------------------------------------|-------|-------|-------|-------|---------------------|
|                    |                                     | mean  | SE    | mean  | SE    |                     |
| QLA45              | Sqrt leaf surface area, day 45 (cm) | 11.6  | 0.449 | 14.8  | 0.497 | 28                  |
| QLA50              | Sqrt leaf surface area, day 50 (cm) | 12.2  | 0.426 | 17.4  | 0.433 | 43                  |
| QLA55              | Sqrt leaf surface area, day 55 (cm) | 13.6  | 0.471 | 19.6  | 0.676 | 44                  |
| SFW                | Shoot fresh weight (g)              | 14    | 1.3   | 35.8  | 2.16  | 156                 |
| RFW                | Root fresh weight (g)               | 17.6  | 1.64  | 44.5  | 2.84  | 153                 |
| SDW                | Shoot dry weight (g)                | 1.78  | 0.184 | 4.29  | 0.284 | 142                 |
| RDW                | Root dry weight (g)                 | 1.39  | 0.122 | 3.28  | 0.185 | 136                 |
| RV                 | Root volume (ml)                    | 18.6  | 1.75  | 48.4  | 3.17  | 160                 |
| MaxNR              | Maximum number of roots             | 36.3  | 1.78  | 53.9  | 2.03  | 49                  |
| MNR                | Median number of roots              | 23.4  | 1.35  | 39.8  | 1.57  | 70                  |
| NB                 | Network bushiness                   | 1.59  | 0.054 | 1.37  | 0.028 | -14                 |
| NetA               | Network area (cm <sup>2</sup> )     | 95.1  | 6.89  | 181   | 9.72  | 90                  |
| NL                 | Network length (cm)                 | 1870  | 150   | 3610  | 206   | 93                  |
| NLD                | Network Length Distribution         | 0.937 | 0.058 | 0.661 | 0.033 | -29                 |
| NP                 | Network perimeter (cm)              | 3640  | 281   | 6870  | 390   | 89                  |

|     |                                         |       |       |       |       |     |
|-----|-----------------------------------------|-------|-------|-------|-------|-----|
| NS  | Network solidity                        | 0.129 | 0.004 | 0.185 | 0.006 | 43  |
| NSA | Network surface area (cm <sup>2</sup> ) | 361   | 27.1  | 698   | 38.4  | 93  |
| NV  | Network volume (cm <sup>3</sup> )       | 6.84  | 0.536 | 13.3  | 0.808 | 95  |
| Ca  | Leaf Ca concentration (ppm)             | 9470  | 435   | 12900 | 589   | 36  |
| K   | Leaf K concentration (ppm)              | 24000 | 612   | 18300 | 1130  | -24 |
| Mn  | Leaf Mn concentration (ppm)             | 115   | 5.25  | 149   | 6.26  | 29  |
| P   | Leaf P concentration (ppm)              | 612   | 19.3  | 1160  | 28.9  | 89  |
| Se  | Leaf Se concentration (ppm)             | 0.663 | 0.017 | 0.498 | 0.017 | -25 |
| Sr  | Leaf Sr concentration (ppm)             | 39    | 1.86  | 51.3  | 2.85  | 32  |

521

522 <sup>1</sup> Traits listed showed a significant (adjP < 0.05) main effect of fungal inoculation.

523 <sup>2</sup> GiA Roots traits as described in full by Galkovskyi et al. 2012

524 <sup>3</sup> Mycorrhiza response calculated as M-NC/NC x 100

525

## 526 FIGURE LEGENDS

527 **Figure 1. Experimental set-up and plant growth response.** The maize inbred lines B73 and  
528 W22 were grown with (M) or without (NC) inoculation with the AM fungus *Rhizophagus*  
529 *irregularis*. A) Overall view of the growth system, the block in the foreground are inoculated  
530 plants. B) Square root of leaf surface area (QLA) for M and NC individuals, quantified every 5  
531 days from 5 days after emergence until harvest at day 55. Boxes show 1st quartile, median and  
532 3rd quartile. Whiskers extend to the most extreme points within 1.5x box length; outlying values  
533 beyond this range are shown as filled circles. Days at which M and NC groups were significantly  
534 different for a given inbred (Tukey HSD;  $p < 0.05$ ) are indicated with an asterisk. C) Root crown  
535 on an M plant, illustrating the profusion of lateral roots and characteristic yellow pigmentation.  
536 D) Trypan-blue stained root section of an M plant, showing root-internal hyphae (hyp), vesicles  
537 (ves), and arbuscules (arb). Scale bar, 15  $\mu\text{m}$ . E) Colonization (% root length colonized) for B73  
538 and W22, determined with respect to fungal hyphae (H), arbuscules (A) and vesicles (V). Points  
539 indicate individual plants. Boxes and whiskers as in B).

540  
541 **Figure 2. Principal component analysis describes variation in root system architecture.** A)  
542 Stacked (overlay) images of the root systems of all plants in the NC/M B73/W22 treatment  
543 groups. Scale bar, 30 cm. B) The contribution of root system traits to principal components (PCs)  
544 1 to 4. The variance explained by each PC is given in parentheses. See Table S1 for trait  
545 abbreviations. C) Root system images arranged by loading on each of PCs 1 to 4. Coloured  
546 points at the base of the image indicate genotype and fungal treatment as described in the key.  
547 Traits with a major positive or negative contribution to each PC are listed on the right or left of  
548 the plot, respectively. A single word description of the extremes of each PC is given at the side  
549 of each plot.

550  
551 **Figure 3. Inoculation with AM fungi is correlated with an increase in size and branching of**  
552 **the root system.** Root system images projected by Linear Discriminants (LDs) 1 and 2. Colored  
553 points indicate genotype and fungal treatment as described in the key.

554  
555 **Figure 4. Root system architecture is correlated with total element content in the leaf.** A)  
556 Heatmap representation of pairwise correlations of root system principal components (PC) with  
557 their contributing GiARoot traits (Abbreviated as described in Materials and Methods. SFW,  
558 shoot fresh weight and SDW, shoot dry weight also shown). B) Heatmap representation of  
559 pairwise correlations of root system principal components (PC) and colonization measures (%  
560 root length of hyphae (Hyp), vesicles (Ves) and arbuscules (Arb)) with total element content. In  
561 both A) and B) significant correlations are indicated by asterisks (\*,  $p < 0.05$ ; \*\*,  $p < 0.01$ ; \*\*\*,  
562  $p < 0.001$ ).

563  
564 **Figure 5. AM colonization modifies the relationship between root system size and element**  
565 **content.** Scatter plot representation of the relationship between element content (shown in mg or

566  $\mu\text{g}$ ) and root system size (estimated as the GiaRoots trait NSA) for twenty named elements.  
567 Colored points indicate genotype and fungal treatment of individual plants as described in the  
568 key. Black and red lines indicate the fit for the additive model  $Total \sim NSA + Fungus$  for levels  
569 NC and M of *Fungus*, respectively. The p-value for an effect of *Fungus* (calculated using Type I  
570 SS; adjusted for multiple tests) is given in parentheses following the element name in the plot  
571 title.  
572

573 **Figure S1. Impact of AM colonization of growth, root architecture and nutrient levels.** The  
574 maize inbred lines B73 and W22 were grown with (M) or without (NC) inoculation with the AM  
575 fungus *Rhizophagus irregularis*. Traits are described in main text and Table S1, S2, S3. Boxes  
576 show 1st quartile, median and 3rd quartile. Whiskers extend to the most extreme points within  
577 1.5x box length; outlying values beyond this range are not shown. Line segments show the  
578 reaction norm for each genotype, connecting median values for NC and M.  
579

580 **ACKNOWLEDGEMENTS**

581 We thank Greg Ziegler and Ivan Baxter (Danforth Center, MO) for ionomic analysis and  
582 Benjamin Barrales Gámez for assistance in the greenhouse experiment. We thank the reviewers  
583 for constructive feedback on the manuscript. M. Rosario Ramírez-Flores was supported by the  
584 Mexican National Council of Science and Technology (CONACYT) through its PhD scholarship  
585 program. This work was supported by the Mexican National Commission for the Study and Use  
586 of Biodiversity (CONABIO) project *Impact of native arbuscular mycorrhizal fungi on maize*  
587 *performance*.

588

589 **AUTHOR CONTRIBUTIONS**

590 RRF, RJHS and VOP designed the study. MRRF conducted the experiments. MRRF, EBB and  
591 RRA performed image analysis. All authors contributed to data analysis and writing of the  
592 manuscript.

593 M. Rosario Ramírez-Flores<sup>1</sup>, Elohim Bello-Bello<sup>2</sup>, Rubén Rellán-Álvarez<sup>2,3</sup>, Ruairidh J. H.  
594 Sawers<sup>2,4\*</sup> and Víctor Olalde-Portugal<sup>1\*</sup>

595

596 **PREPRINT**

597 This article is available as a preprint at <https://www.biorxiv.org/content/10.1101/695411v1>

598

599

600 **CONFLICT OF INTEREST STATEMENT**

601 Rubén Rellán-Álvarez is a review editor for Plant Direct.

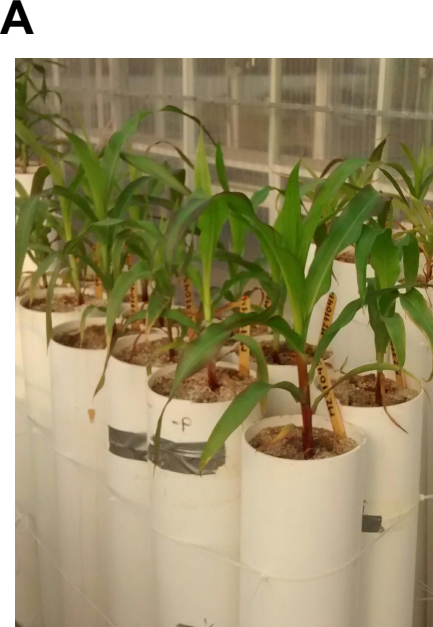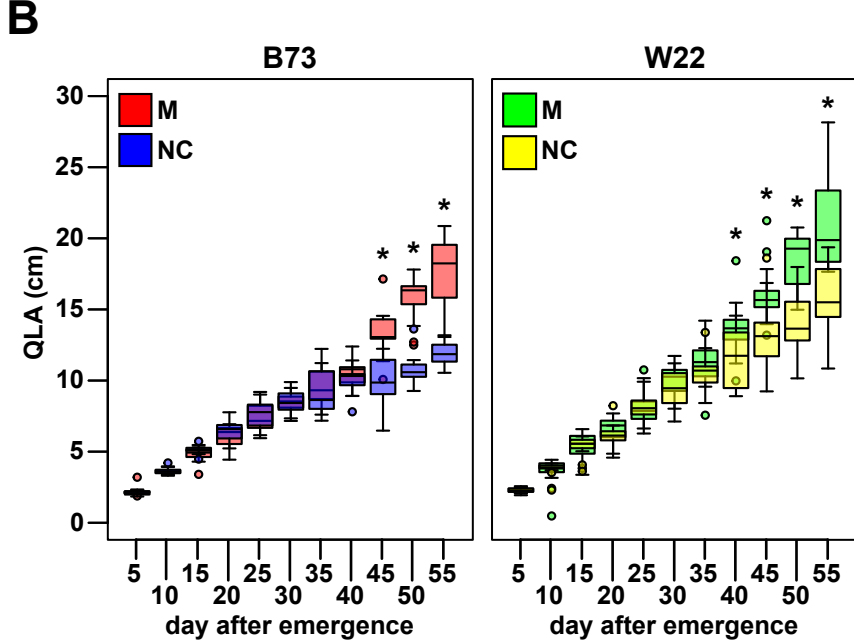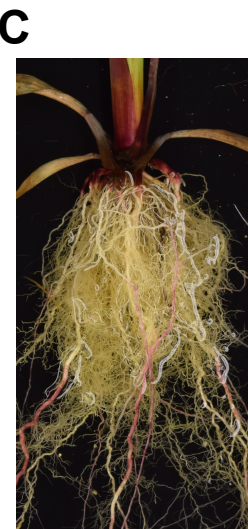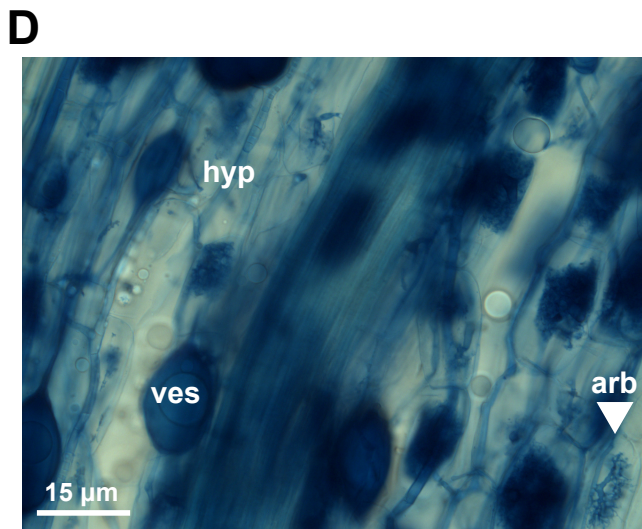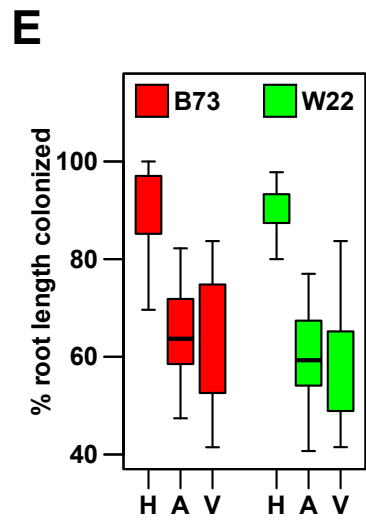

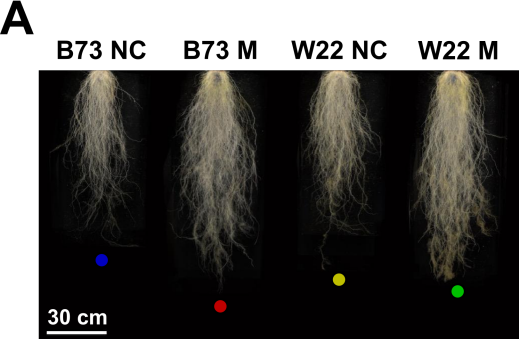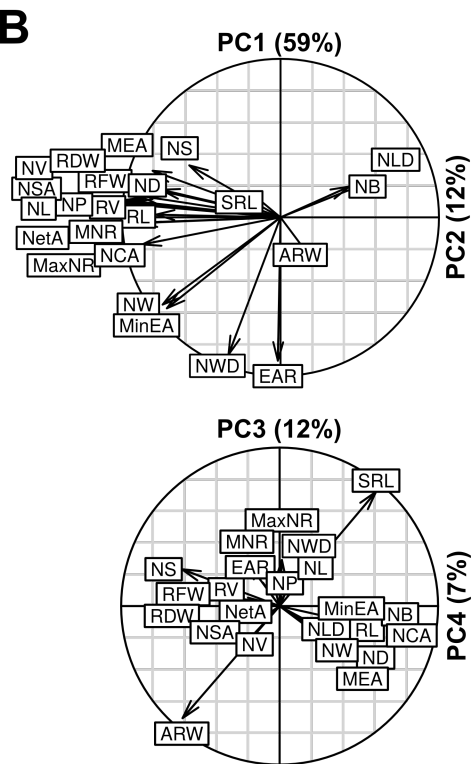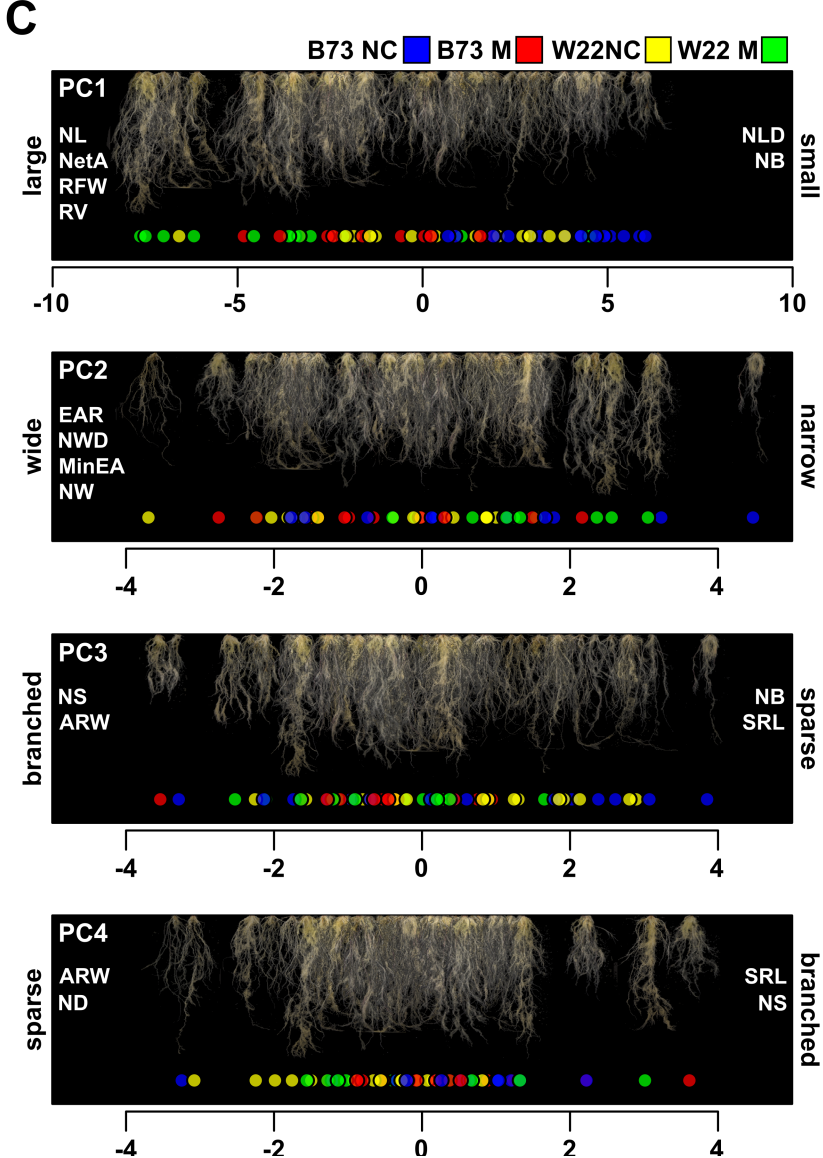



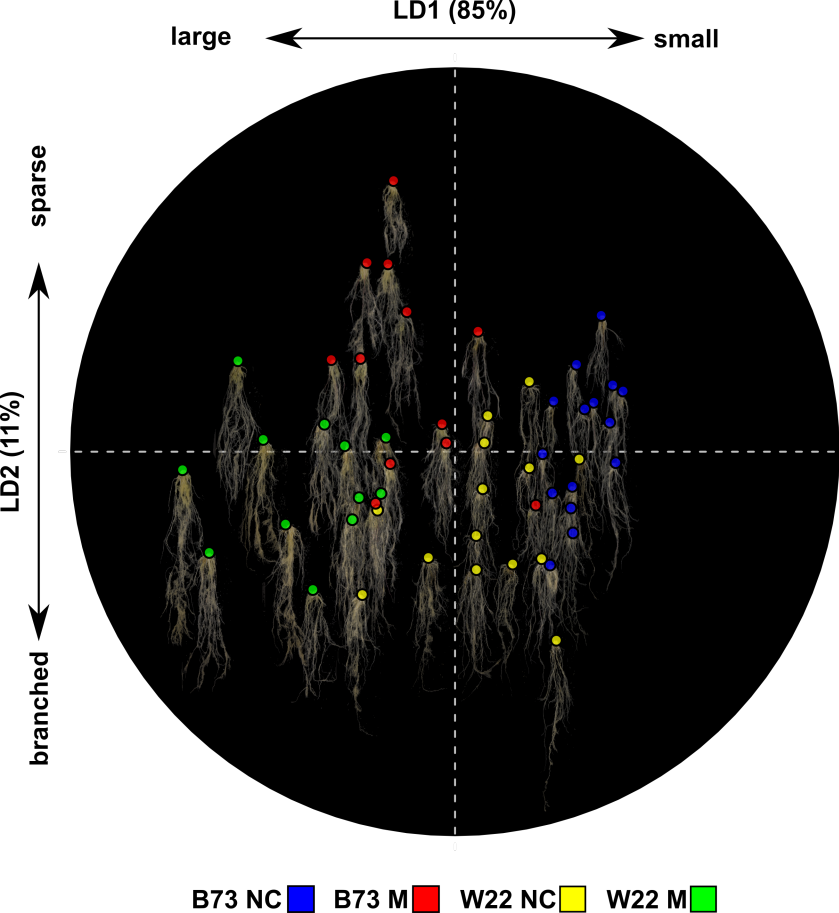



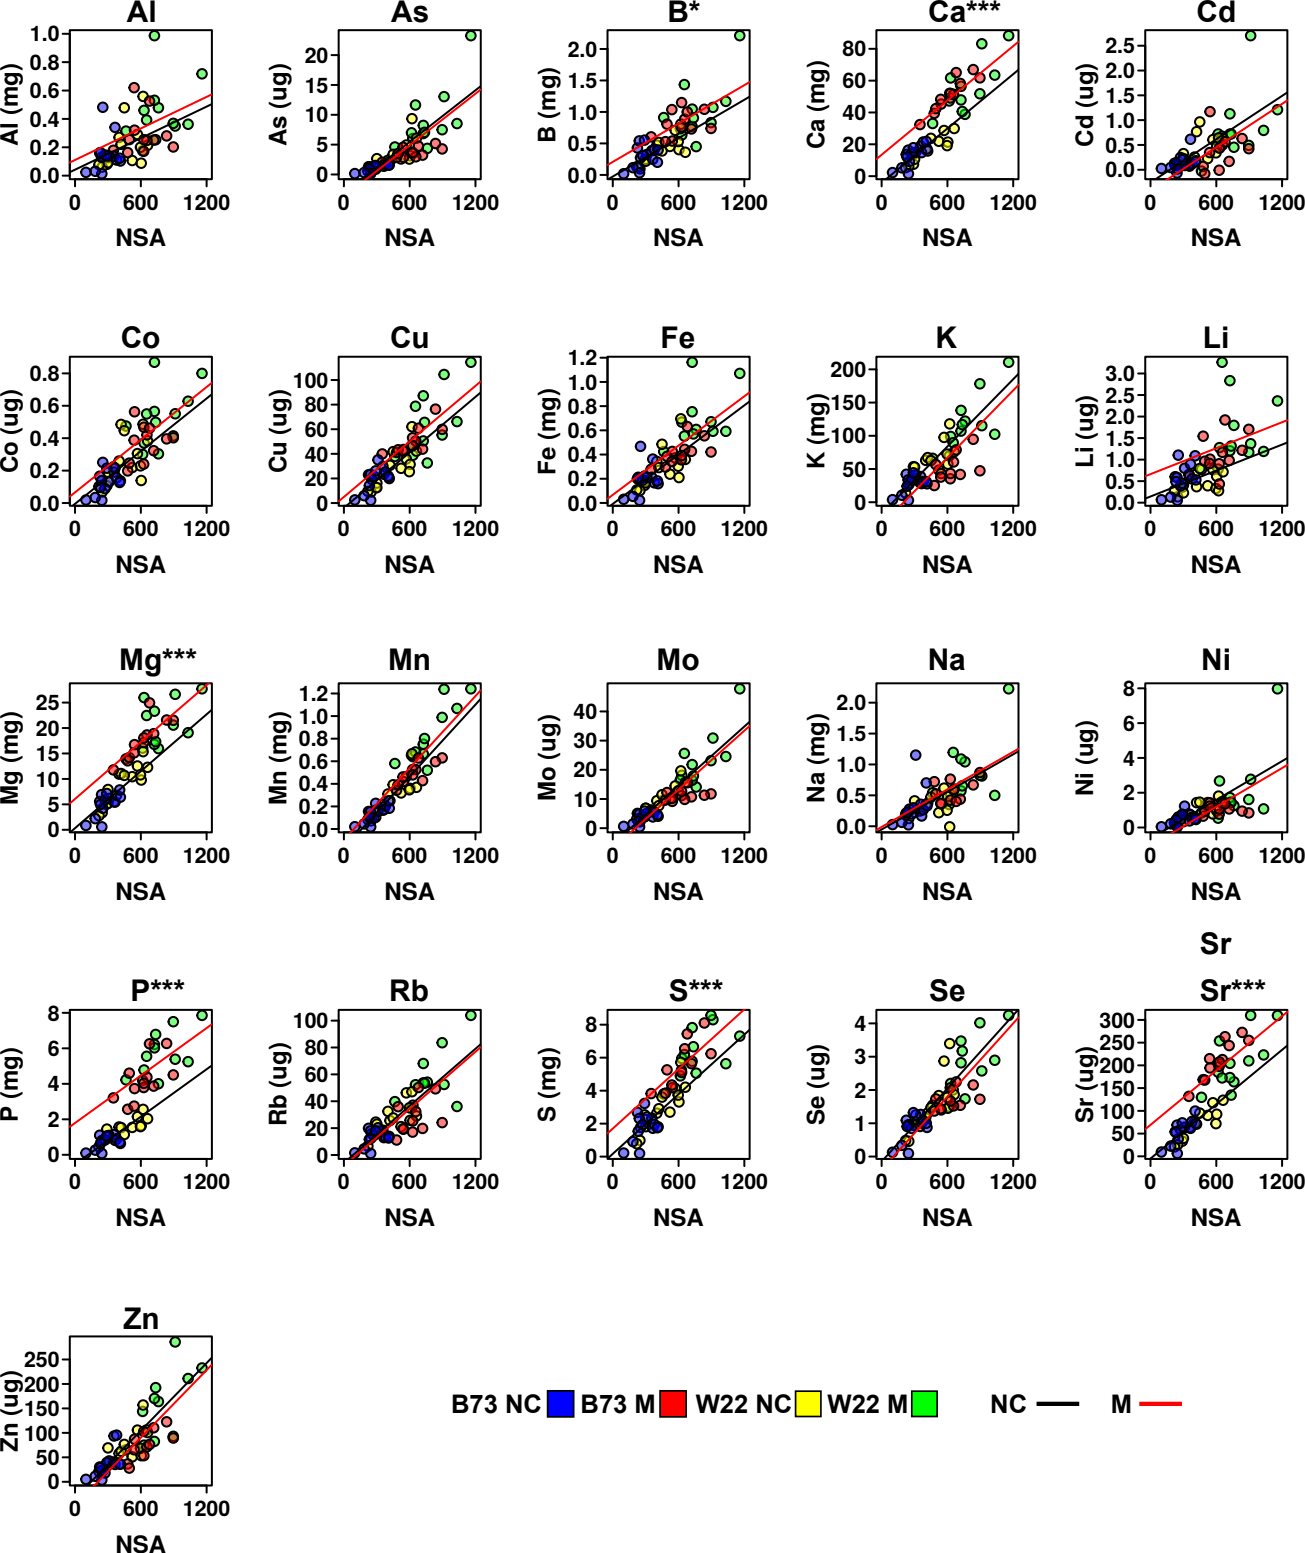

Source: https://www.biorxiv.org/content/biorxiv/early/2019/11/19/695411.full.pdf
